# Supplementary material for: Diversity and function of culturable actinobacteria in the root-associated of Salvia miltiorrhiza Bunge
Source: PeerJ. 2021 Jul 9;9:e11749. doi: 10.7717/peerj.11749 (PMC8274492; doi:10.7717/peerj.11749)
Supplement: Supplemental Information 2 [file peerj-09-11749-s002.xlsx]

## Sheet: Sheet1
KO_Pathway	Relative abundance	definition
ko00230	1.17869	Metabolism; Nucleotide metabolism; Purine metabolism
ko00190	0.890084	Metabolism; Energy metabolism; Oxidative phosphorylation
ko00620	0.847856	Metabolism; Carbohydrate metabolism; Pyruvate metabolism
ko00630	0.785173	Metabolism; Carbohydrate metabolism; Glyoxylate and dicarboxylate metabolism
ko00010	0.784382	Metabolism; Carbohydrate metabolism; Glycolysis / Gluconeogenesis
ko00500	0.766448	Metabolism; Carbohydrate metabolism; Starch and sucrose metabolism
ko00240	0.760334	Metabolism; Nucleotide metabolism; Pyrimidine metabolism
ko00520	0.679118	Metabolism; Carbohydrate metabolism; Amino sugar and nucleotide sugar metabolism
ko00720	0.67883	Metabolism; Energy metabolism; Carbon fixation pathways in prokaryotes
ko00020	0.677073	Metabolism; Carbohydrate metabolism; Citrate cycle (TCA cycle)
ko00650	0.610297	Metabolism; Carbohydrate metabolism; Butanoate metabolism
ko00260	0.592139	Metabolism; Amino acid metabolism; Glycine, serine and threonine metabolism
ko00250	0.582564	Metabolism; Amino acid metabolism; Alanine, aspartate and glutamate metabolism
ko00280	0.57174	Metabolism; Amino acid metabolism; Valine, leucine and isoleucine degradation
ko00640	0.525973	Metabolism; Carbohydrate metabolism; Propanoate metabolism
ko00270	0.475683	Metabolism; Amino acid metabolism; Cysteine and methionine metabolism
ko00680	0.462074	Metabolism; Energy metabolism; Methane metabolism
ko00052	0.460245	Metabolism; Carbohydrate metabolism; Galactose metabolism
ko00910	0.455816	Metabolism; Energy metabolism; Nitrogen metabolism
ko00030	0.444146	Metabolism; Carbohydrate metabolism; Pentose phosphate pathway
ko00860	0.426002	Metabolism; Metabolism of cofactors and vitamins; Porphyrin and chlorophyll metabolism
ko00071	0.42418	Metabolism; Lipid metabolism; Fatty acid degradation
ko00380	0.39511	Metabolism; Amino acid metabolism; Tryptophan metabolism
ko00061	0.373409	Metabolism; Lipid metabolism; Fatty acid biosynthesis
ko00220	0.366905	Metabolism; Amino acid metabolism; Arginine biosynthesis
ko00360	0.364707	Metabolism; Amino acid metabolism; Phenylalanine metabolism
ko00362	0.347097	Metabolism; Xenobiotics biodegradation and metabolism; Benzoate degradation
ko00051	0.339638	Metabolism; Carbohydrate metabolism; Fructose and mannose metabolism
ko00550	0.339172	Metabolism; Glycan biosynthesis and metabolism; Peptidoglycan biosynthesis
ko00330	0.317373	Metabolism; Amino acid metabolism; Arginine and proline metabolism
ko00310	0.311859	Metabolism; Amino acid metabolism; Lysine degradation
ko00900	0.296307	Metabolism; Metabolism of terpenoids and polyketides; Terpenoid backbone biosynthesis
ko00710	0.295473	Metabolism; Energy metabolism; Carbon fixation in photosynthetic organisms
ko00480	0.279552	Metabolism; Metabolism of other amino acids; Glutathione metabolism
ko00770	0.278218	Metabolism; Metabolism of cofactors and vitamins; Pantothenate and CoA biosynthesis
ko00290	0.264756	Metabolism; Amino acid metabolism; Valine, leucine and isoleucine biosynthesis
ko00410	0.263188	Metabolism; Metabolism of other amino acids; beta-Alanine metabolism
ko00340	0.258764	Metabolism; Amino acid metabolism; Histidine metabolism
ko00400	0.254947	Metabolism; Amino acid metabolism; Phenylalanine, tyrosine and tryptophan biosynthesis
ko00564	0.249531	Metabolism; Lipid metabolism; Glycerophospholipid metabolism
ko00300	0.248346	Metabolism; Amino acid metabolism; Lysine biosynthesis
ko00790	0.247878	Metabolism; Metabolism of cofactors and vitamins; Folate biosynthesis
ko00760	0.238089	Metabolism; Metabolism of cofactors and vitamins; Nicotinate and nicotinamide metabolism
ko00350	0.219898	Metabolism; Amino acid metabolism; Tyrosine metabolism
ko00920	0.219192	Metabolism; Energy metabolism; Sulfur metabolism
ko00670	0.218764	Metabolism; Metabolism of cofactors and vitamins; One carbon pool by folate
ko00450	0.215574	Metabolism; Metabolism of other amino acids; Selenocompound metabolism
ko00561	0.210475	Metabolism; Lipid metabolism; Glycerolipid metabolism
ko00460	0.205846	Metabolism; Metabolism of other amino acids; Cyanoamino acid metabolism
ko00521	0.198752	Metabolism; Biosynthesis of other secondary metabolites; Streptomycin biosynthesis
ko00562	0.197824	Metabolism; Carbohydrate metabolism; Inositol phosphate metabolism
ko00040	0.19163	Metabolism; Carbohydrate metabolism; Pentose and glucuronate interconversions
ko00511	0.187686	Metabolism; Glycan biosynthesis and metabolism; Other glycan degradation
ko00130	0.174743	Metabolism; Metabolism of cofactors and vitamins; Ubiquinone and other terpenoid-quinone biosynthesis
ko00780	0.174292	Metabolism; Metabolism of cofactors and vitamins; Biotin metabolism
ko01040	0.171308	Metabolism; Lipid metabolism; Biosynthesis of unsaturated fatty acids
ko00730	0.162254	Metabolism; Metabolism of cofactors and vitamins; Thiamine metabolism
ko00660	0.157897	Metabolism; Carbohydrate metabolism; C5-Branched dibasic acid metabolism
ko00053	0.154527	Metabolism; Carbohydrate metabolism; Ascorbate and aldarate metabolism
ko00940	0.152632	Metabolism; Biosynthesis of other secondary metabolites; Phenylpropanoid biosynthesis
ko00261	0.147057	Metabolism; Biosynthesis of other secondary metabolites; Monobactam biosynthesis
ko00983	0.146349	Metabolism; Xenobiotics biodegradation and metabolism; Drug metabolism - other enzymes
ko00333	0.145389	Metabolism; Biosynthesis of other secondary metabolites; Prodigiosin biosynthesis
ko00430	0.143718	Metabolism; Metabolism of other amino acids; Taurine and hypotaurine metabolism
ko00627	0.134689	Metabolism; Xenobiotics biodegradation and metabolism; Aminobenzoate degradation
ko00072	0.116131	Metabolism; Lipid metabolism; Synthesis and degradation of ketone bodies
ko00600	0.114247	Metabolism; Lipid metabolism; Sphingolipid metabolism
ko00625	0.112336	Metabolism; Xenobiotics biodegradation and metabolism; Chloroalkane and chloroalkene degradation
ko00903	0.105913	Metabolism; Metabolism of terpenoids and polyketides; Limonene and pinene degradation
ko00750	0.102749	Metabolism; Metabolism of cofactors and vitamins; Vitamin B6 metabolism
ko00531	0.1003	Metabolism; Glycan biosynthesis and metabolism; Glycosaminoglycan degradation
