# Supplementary material for: Diversity and function of culturable actinobacteria in the root-associated of Salvia miltiorrhiza Bunge
Source: PeerJ. 2021 Jul 9;9:e11749. doi: 10.7717/peerj.11749 (PMC8274492; doi:10.7717/peerj.11749)
Supplement: Supplemental Information 3 [file peerj-09-11749-s003.xlsx]

## Sheet: Sheet1
CAZy_Modules	Relative abundance	Number of matched genes
GH:Glycoside Hydrolases	0.0317627	12799
CBM:Carbohydrate-Binding Modules	0.0212853	8575
GT:Glycosyl Transferases	0.0116367	4354
CE:Carbohydrate Esterases	0.00458641	1705
PL:Polysaccharide Lyases	0.00200513	651
AA:Auxiliary Activities	0.00112792	384
