# Supplementary material for: Diversity and function of culturable actinobacteria in the root-associated of Salvia miltiorrhiza Bunge
Source: PeerJ. 2021 Jul 9;9:e11749. doi: 10.7717/peerj.11749 (PMC8274492; doi:10.7717/peerj.11749)
Supplement: Supplemental Information 4 [file peerj-09-11749-s004.xlsx]

## Sheet: Sheet1
Functional_Category	Relative abundance	Number of matched genes
S: Function unknown	0.283085	119219
K: Transcription	0.0775576	29107
G: Carbohydrate transport and metabolism	0.0741813	26863
E: Amino acid transport and metabolism	0.063505	22127
C: Energy production and conversion	0.0538662	17941
T: Signal transduction mechanisms	0.048216	18630
P: Inorganic ion transport and metabolism	0.042034	15350
L: Replication, recombination and repair	0.0349377	15142
M: Cell wall/membrane/envelope biogenesis	0.0328777	12398
I: Lipid transport and metabolism	0.0295471	11191
Q: Secondary metabolites biosynthesis, transport and catabolism	0.0269946	14249
J: Translation, ribosomal structure and biogenesis	0.0253399	6190
O: Posttranslational modification, protein turnover, chaperones	0.0227764	7721
H: Coenzyme transport and metabolism	0.0212493	7263
V: Defense mechanisms	0.0184743	7518
F: Nucleotide transport and metabolism	0.0149592	4275
U: Intracellular trafficking, secretion, and vesicular transport	0.00539425	1705
D: Cell cycle control, cell division, chromosome partitioning	0.00511222	1822
B: Chromatin structure and dynamics	0.000160504	58
A: RNA processing and modification	9.59283e-05	38
N: Cell motility	3.35656e-05	22
Z: Cytoskeleton	3.06591e-05	35
W: Extracellular structures	3.30467e-06	2
